# Supplementary material
Source: publisher site journal article supplement (https://www.spandidos-publications.com/5285/downloadSupplementary)
Supplement: Supplementary file 1 [file downloadSupplementary]

## Sheet: miRNA-DEmRNA
Table SVI. A total of 285 miRNA-mRNA interactions obtained between 8 liver cancer-related miRNAs and 505 DEmRNAs.
Name	Gene	TargetScan sites	PicTar sites	RNA22 sites	PITA sites	miRanda sites
hsa-miR-125a-3p	AADAT	0[0,0]	0[0,0]	0[0,0]	0[0,0]	1[3,23]
hsa-miR-125a-3p	ACSL1	0[0,0]	0[0,0]	0[0,0]	0[0,0]	1[2,19]
hsa-miR-125a-3p	CD109	0[0,0]	0[0,0]	0[0,0]	0[0,0]	1[2,32]
hsa-miR-125a-3p	CDC20	0[0,0]	0[0,0]	0[0,0]	0[0,0]	1[2,173]
hsa-miR-125a-3p	CDC7	0[0,0]	0[0,0]	0[0,0]	0[0,0]	1[1,7]
hsa-miR-125a-3p	DLGAP5	0[0,0]	0[0,0]	0[0,0]	0[0,0]	1[4,54]
hsa-miR-125a-3p	EPB41L4B	0[0,0]	0[0,0]	0[0,0]	0[0,0]	1[1,8]
hsa-miR-125a-3p	FANCI	0[0,0]	3[2,86]	0[0,0]	0[0,0]	1[1,12]
hsa-miR-125a-3p	FBLN5	0[0,0]	0[0,0]	0[0,0]	0[0,0]	1[1,16]
hsa-miR-125a-3p	HELLS	0[0,0]	0[0,0]	0[0,0]	0[0,0]	1[7,48]
hsa-miR-125a-3p	HOXA13	0[0,0]	0[0,0]	0[0,0]	0[0,0]	1[2,73]
hsa-miR-125a-3p	HPGD	0[0,0]	0[0,0]	0[0,0]	0[0,0]	1[1,6]
hsa-miR-125a-3p	IL33	1[2,24]	0[0,0]	0[0,0]	0[0,0]	1[2,24]
hsa-miR-125a-3p	MFSD2A	0[0,0]	0[0,0]	0[0,0]	0[0,0]	1[1,16]
hsa-miR-125a-3p	PCDH9	0[0,0]	0[0,0]	0[0,0]	0[0,0]	1[2,12]
hsa-miR-125a-3p	RSPO3	0[0,0]	0[0,0]	0[0,0]	0[0,0]	1[1,8]
hsa-miR-125a-3p	SRXN1	0[0,0]	0[0,0]	0[0,0]	0[0,0]	1[1,5]
hsa-miR-125a-3p	TCF19	0[0,0]	0[0,0]	0[0,0]	0[0,0]	1[1,7]
hsa-miR-125a-3p	TTK	0[0,0]	0[0,0]	0[0,0]	0[0,0]	1[3,10]
hsa-miR-125a-3p	UHRF1	0[0,0]	0[0,0]	0[0,0]	0[0,0]	1[3,102]
hsa-miR-125a-3p	ZFP36	0[0,0]	0[0,0]	0[0,0]	0[0,0]	1[8,333]
hsa-miR-126-5p	FEN1	0[0,0]	0[0,0]	1[1,13]	0[0,0]	0[0,0]
hsa-miR-126-5p	SLC3A1	0[0,0]	0[0,0]	1[4,544]	0[0,0]	0[0,0]
hsa-miR-129-5p	AADAT	0[0,0]	0[0,0]	1[1,15]	0[0,0]	0[0,0]
hsa-miR-129-5p	ACADL	0[0,0]	0[0,0]	0[0,0]	0[0,0]	1[1,8]
hsa-miR-129-5p	ACSL1	0[0,0]	0[0,0]	0[0,0]	0[0,0]	2[9,90]
hsa-miR-129-5p	ACSL4	0[0,0]	4[11,721]	0[0,0]	2[12,679]	3[12,682]
hsa-miR-129-5p	ATF5	0[0,0]	0[0,0]	0[0,0]	0[0,0]	2[4,43]
hsa-miR-129-5p	BASP1	0[0,0]	0[0,0]	0[0,0]	0[0,0]	2[2,4462]
hsa-miR-129-5p	CDC37L1	0[0,0]	0[0,0]	0[0,0]	0[0,0]	1[3,566]
hsa-miR-129-5p	CDK1	0[0,0]	0[0,0]	0[0,0]	0[0,0]	1[11,945]
hsa-miR-129-5p	CDKN2C	0[0,0]	0[0,0]	0[0,0]	0[0,0]	1[2,220]
hsa-miR-129-5p	CEP55	0[0,0]	0[0,0]	0[0,0]	0[0,0]	1[1,2]
hsa-miR-129-5p	COL4A1	0[0,0]	0[0,0]	0[0,0]	0[0,0]	3[4,3441]
hsa-miR-129-5p	CYTIP	0[0,0]	0[0,0]	0[0,0]	0[0,0]	1[1,5]
hsa-miR-129-5p	DLG5	0[0,0]	0[0,0]	1[5,259]	0[0,0]	0[0,0]
hsa-miR-129-5p	DNAJC6	0[0,0]	0[0,0]	0[0,0]	0[0,0]	1[2,10]
hsa-miR-129-5p	E2F7	1[20,556]	0[0,0]	0[0,0]	1[20,556]	1[20,556]
hsa-miR-129-5p	EBF1	0[0,0]	7[5,149]	0[0,0]	0[0,0]	3[3,59]
hsa-miR-129-5p	ECT2	0[0,0]	0[0,0]	0[0,0]	0[0,0]	1[2,101]
hsa-miR-129-5p	EDNRB	0[0,0]	0[0,0]	0[0,0]	0[0,0]	2[1,16]
hsa-miR-129-5p	EGR1	0[0,0]	0[0,0]	0[0,0]	0[0,0]	1[5,11]
hsa-miR-129-5p	EGR3	0[0,0]	0[0,0]	0[0,0]	0[0,0]	1[1,9]
hsa-miR-129-5p	EPB41L4B	0[0,0]	0[0,0]	0[0,0]	0[0,0]	1[1,11]
hsa-miR-129-5p	EPHA2	0[0,0]	0[0,0]	1[1,40]	0[0,0]	0[0,0]
hsa-miR-129-5p	FANCI	0[0,0]	0[0,0]	0[0,0]	0[0,0]	1[2,202]
hsa-miR-129-5p	FBLN5	0[0,0]	0[0,0]	0[0,0]	0[0,0]	1[2,18]
hsa-miR-129-5p	FGF13	0[0,0]	0[0,0]	1[1,5]	0[0,0]	1[1,5]
hsa-miR-129-5p	FOXM1	0[0,0]	0[0,0]	1[2,40]	0[0,0]	0[0,0]
hsa-miR-129-5p	GEM	0[0,0]	0[0,0]	0[0,0]	0[0,0]	1[1,159]
hsa-miR-129-5p	GPT2	0[0,0]	0[0,0]	1[1,10]	0[0,0]	0[0,0]
hsa-miR-129-5p	GREM2	0[0,0]	0[0,0]	0[0,0]	0[0,0]	1[2,48]
hsa-miR-129-5p	HOXA13	0[0,0]	0[0,0]	0[0,0]	0[0,0]	1[1,235]
hsa-miR-129-5p	ITGA6	0[0,0]	1[1,1]	0[0,0]	0[0,0]	0[0,0]
hsa-miR-129-5p	KBTBD11	0[0,0]	0[0,0]	1[1,59]	0[0,0]	0[0,0]
hsa-miR-129-5p	KIF20A	0[0,0]	0[0,0]	0[0,0]	0[0,0]	2[6,111]
hsa-miR-129-5p	LUM	0[0,0]	0[0,0]	0[0,0]	0[0,0]	2[2,28]
hsa-miR-129-5p	MSH2	0[0,0]	0[0,0]	0[0,0]	0[0,0]	1[2,0]
hsa-miR-129-5p	NR4A2	0[0,0]	1[7,402]	1[1,142]	0[0,0]	0[0,0]
hsa-miR-129-5p	NRCAM	0[0,0]	0[0,0]	0[0,0]	0[0,0]	1[1,8]
hsa-miR-129-5p	PER1	0[0,0]	0[0,0]	0[0,0]	0[0,0]	1[3,11]
hsa-miR-129-5p	RND3	0[0,0]	0[0,0]	0[0,0]	0[0,0]	3[4,144]
hsa-miR-129-5p	RNF125	0[0,0]	0[0,0]	0[0,0]	0[0,0]	1[1,5]
hsa-miR-129-5p	ROBO1	0[0,0]	0[0,0]	0[0,0]	0[0,0]	1[2,21]
hsa-miR-129-5p	RRAGD	0[0,0]	0[0,0]	0[0,0]	0[0,0]	1[14,94]
hsa-miR-129-5p	RSPO3	0[0,0]	0[0,0]	0[0,0]	0[0,0]	1[1,8]
hsa-miR-129-5p	RUNX1	1[3,138]	3[3,211]	0[0,0]	2[3,175]	1[3,138]
hsa-miR-129-5p	SLC26A2	0[0,0]	0[0,0]	1[2,46]	0[0,0]	0[0,0]
hsa-miR-129-5p	SOCS2	0[0,0]	2[2,9]	0[0,0]	0[0,0]	1[1,8]
hsa-miR-129-5p	SORL1	0[0,0]	3[1,37]	0[0,0]	0[0,0]	1[2,47]
hsa-miR-129-5p	SQLE	0[0,0]	0[0,0]	0[0,0]	0[0,0]	1[2,161]
hsa-miR-129-5p	STK39	0[0,0]	0[0,0]	1[1,12]	0[0,0]	2[2,222]
hsa-miR-129-5p	TRIM71	0[0,0]	0[0,0]	0[0,0]	0[0,0]	1[6,3]
hsa-miR-129-5p	TRIP13	0[0,0]	0[0,0]	0[0,0]	0[0,0]	1[4,727]
hsa-miR-129-5p	TTK	0[0,0]	0[0,0]	0[0,0]	0[0,0]	1[3,16]
hsa-miR-129-5p	TXNRD1	0[0,0]	0[0,0]	0[0,0]	0[0,0]	1[8,372]
hsa-miR-129-5p	VIPR1	0[0,0]	0[0,0]	0[0,0]	0[0,0]	1[1,6]
hsa-miR-129-5p	ZFP1	0[0,0]	0[0,0]	0[0,0]	0[0,0]	1[1,6]
hsa-miR-129-5p	ZIC2	0[0,0]	0[0,0]	0[0,0]	1[10,210]	1[11,223]
hsa-miR-145-5p	ACSL4	1[6,77]	1[6,77]	0[0,0]	1[6,77]	1[6,77]
hsa-miR-145-5p	ARRDC4	0[0,0]	0[0,0]	0[0,0]	0[0,0]	1[6,883]
hsa-miR-145-5p	BASP1	0[0,0]	0[0,0]	0[0,0]	0[0,0]	1[2,683]
hsa-miR-145-5p	C1RL	0[0,0]	0[0,0]	0[0,0]	0[0,0]	1[1,20]
hsa-miR-145-5p	CCNE2	0[0,0]	0[0,0]	1[6,0]	0[0,0]	0[0,0]
hsa-miR-145-5p	CD109	0[0,0]	0[0,0]	0[0,0]	0[0,0]	1[1,8]
hsa-miR-145-5p	CDC37L1	1[2,0]	1[2,0]	0[0,0]	1[3,23]	1[6,59]
hsa-miR-145-5p	CLGN	0[0,0]	0[0,0]	0[0,0]	0[0,0]	1[2,35]
hsa-miR-145-5p	CPS1	0[0,0]	0[0,0]	0[0,0]	0[0,0]	1[2,1039]
hsa-miR-145-5p	DEPDC1B	0[0,0]	0[0,0]	0[0,0]	0[0,0]	1[2,24]
hsa-miR-145-5p	DTL	0[0,0]	0[0,0]	0[0,0]	0[0,0]	1[1,129]
hsa-miR-145-5p	EBF1	1[1,8]	1[1,8]	0[0,0]	0[0,0]	1[1,8]
hsa-miR-145-5p	FGF13	0[0,0]	0[0,0]	0[0,0]	0[0,0]	1[1,9]
hsa-miR-145-5p	FGFR2	0[0,0]	0[0,0]	0[0,0]	0[0,0]	1[1,2]
hsa-miR-145-5p	GADD45A	0[0,0]	0[0,0]	0[0,0]	0[0,0]	1[11,719]
hsa-miR-145-5p	GINS1	0[0,0]	0[0,0]	0[0,0]	0[0,0]	1[2,407]
hsa-miR-145-5p	HELLS	0[0,0]	0[0,0]	0[0,0]	0[0,0]	1[5,174]
hsa-miR-145-5p	MSH2	0[0,0]	0[0,0]	0[0,0]	0[0,0]	1[1,45]
hsa-miR-145-5p	NR4A2	0[0,0]	0[0,0]	0[0,0]	0[0,0]	1[1,32]
hsa-miR-145-5p	NRCAM	0[0,0]	0[0,0]	0[0,0]	0[0,0]	1[1,8]
hsa-miR-145-5p	PBK	0[0,0]	0[0,0]	0[0,0]	0[0,0]	1[1,15]
hsa-miR-145-5p	PLSCR4	0[0,0]	0[0,0]	1[2,2063]	0[0,0]	1[2,2063]
hsa-miR-145-5p	PODXL	1[3,1314]	5[4,3093]	0[0,0]	0[0,0]	0[0,0]
hsa-miR-145-5p	PRC1	0[0,0]	0[0,0]	1[3,25]	0[0,0]	0[0,0]
hsa-miR-145-5p	RUNX1	0[0,0]	0[0,0]	0[0,0]	0[0,0]	1[7,2920]
hsa-miR-145-5p	SERPINI1	0[0,0]	0[0,0]	0[0,0]	0[0,0]	1[2,19]
hsa-miR-145-5p	SORL1	0[0,0]	0[0,0]	0[0,0]	0[0,0]	1[1,10]
hsa-miR-145-5p	STK39	0[0,0]	0[0,0]	1[1,12]	0[0,0]	0[0,0]
hsa-miR-145-5p	TBCE	0[0,0]	0[0,0]	0[0,0]	0[0,0]	2[3,21]
hsa-miR-145-5p	TPR	0[0,0]	0[0,0]	0[0,0]	0[0,0]	1[8,764]
hsa-miR-145-5p	TSPAN12	0[0,0]	0[0,0]	1[2,11]	0[0,0]	0[0,0]
hsa-miR-145-5p	TTK	0[0,0]	0[0,0]	0[0,0]	0[0,0]	1[6,91]
hsa-miR-145-5p	TXNRD1	0[0,0]	0[0,0]	0[0,0]	0[0,0]	1[2,133]
hsa-miR-145-5p	UHRF1	0[0,0]	0[0,0]	0[0,0]	0[0,0]	1[1,2]
hsa-miR-145-5p	ZFP36	0[0,0]	0[0,0]	0[0,0]	0[0,0]	1[5,651]
hsa-miR-145-5p	ZIC2	0[0,0]	0[0,0]	0[0,0]	0[0,0]	1[17,659]
hsa-miR-186-5p	ACSL1	0[0,0]	0[0,0]	0[0,0]	0[0,0]	1[7,70]
hsa-miR-186-5p	ACSL4	2[17,977]	9[23,1512]	0[0,0]	3[18,1258]	5[22,1648]
hsa-miR-186-5p	ANLN	0[0,0]	0[0,0]	0[0,0]	0[0,0]	1[10,1164]
hsa-miR-186-5p	AURKA	0[0,0]	0[0,0]	0[0,0]	0[0,0]	1[3,68]
hsa-miR-186-5p	BAG2	0[0,0]	0[0,0]	0[0,0]	0[0,0]	2[16,1317]
hsa-miR-186-5p	BASP1	0[0,0]	0[0,0]	0[0,0]	0[0,0]	1[3,208]
hsa-miR-186-5p	C1orf112	0[0,0]	0[0,0]	0[0,0]	0[0,0]	1[1,9]
hsa-miR-186-5p	C1orf43	0[0,0]	0[0,0]	0[0,0]	0[0,0]	1[1,44]
hsa-miR-186-5p	CD109	1[2,60]	0[0,0]	0[0,0]	0[0,0]	0[0,0]
hsa-miR-186-5p	CDK1	0[0,0]	0[0,0]	0[0,0]	0[0,0]	2[9,1795]
hsa-miR-186-5p	CDKN2A	0[0,0]	0[0,0]	0[0,0]	0[0,0]	1[7,160]
hsa-miR-186-5p	CENPK	1[3,485]	0[0,0]	0[0,0]	1[3,485]	3[9,742]
hsa-miR-186-5p	CENPW	0[0,0]	0[0,0]	0[0,0]	0[0,0]	2[2,67]
hsa-miR-186-5p	CEP55	0[0,0]	0[0,0]	0[0,0]	0[0,0]	1[2,275]
hsa-miR-186-5p	COL15A1	0[0,0]	0[0,0]	0[0,0]	0[0,0]	1[2,107]
hsa-miR-186-5p	COL4A1	0[0,0]	0[0,0]	0[0,0]	0[0,0]	1[2,179]
hsa-miR-186-5p	CTH	0[0,0]	0[0,0]	0[0,0]	0[0,0]	1[2,35]
hsa-miR-186-5p	CYFIP2	0[0,0]	0[0,0]	0[0,0]	0[0,0]	1[3,26]
hsa-miR-186-5p	DEPDC1B	0[0,0]	0[0,0]	0[0,0]	0[0,0]	1[2,33]
hsa-miR-186-5p	DKK1	1[1,497]	0[0,0]	0[0,0]	0[0,0]	0[0,0]
hsa-miR-186-5p	DLG5	0[0,0]	2[4,283]	0[0,0]	1[1,24]	1[1,24]
hsa-miR-186-5p	DSEL	0[0,0]	0[0,0]	0[0,0]	0[0,0]	1[2,0]
hsa-miR-186-5p	E2F7	0[0,0]	0[0,0]	0[0,0]	0[0,0]	1[3,1138]
hsa-miR-186-5p	E2F8	0[0,0]	0[0,0]	0[0,0]	0[0,0]	2[4,113]
hsa-miR-186-5p	ECT2	0[0,0]	0[0,0]	0[0,0]	0[0,0]	1[2,263]
hsa-miR-186-5p	EGR1	0[0,0]	0[0,0]	0[0,0]	0[0,0]	1[2,13]
hsa-miR-186-5p	EPHA2	0[0,0]	0[0,0]	0[0,0]	0[0,0]	1[1,124]
hsa-miR-186-5p	FAM133A	0[0,0]	0[0,0]	0[0,0]	0[0,0]	1[2,21]
hsa-miR-186-5p	FAM72A	0[0,0]	0[0,0]	1[1,1]	0[0,0]	1[2,9]
hsa-miR-186-5p	FAM83D	0[0,0]	0[0,0]	0[0,0]	0[0,0]	1[15,1123]
hsa-miR-186-5p	GREB1	0[0,0]	0[0,0]	0[0,0]	0[0,0]	1[1,5]
hsa-miR-186-5p	HELLS	0[0,0]	0[0,0]	0[0,0]	0[0,0]	1[2,13]
hsa-miR-186-5p	HGF	0[0,0]	0[0,0]	0[0,0]	0[0,0]	1[1,5]
hsa-miR-186-5p	HMGB2	0[0,0]	0[0,0]	0[0,0]	0[0,0]	1[2,24]
hsa-miR-186-5p	HOXA13	0[0,0]	0[0,0]	0[0,0]	0[0,0]	1[1,8]
hsa-miR-186-5p	ID1	0[0,0]	0[0,0]	0[0,0]	0[0,0]	1[2,592]
hsa-miR-186-5p	ID4	0[0,0]	8[6,857]	0[0,0]	0[0,0]	1[3,689]
hsa-miR-186-5p	IER2	0[0,0]	0[0,0]	1[2,0]	0[0,0]	1[7,554]
hsa-miR-186-5p	IGF1	0[0,0]	1[4,84]	0[0,0]	0[0,0]	0[0,0]
hsa-miR-186-5p	IGFBP3	0[0,0]	0[0,0]	0[0,0]	0[0,0]	1[1,274]
hsa-miR-186-5p	IL1RAP	0[0,0]	0[0,0]	0[0,0]	0[0,0]	1[1,21]
hsa-miR-186-5p	ITGA6	0[0,0]	3[3,169]	0[0,0]	1[1,146]	1[1,146]
hsa-miR-186-5p	KAZN	0[0,0]	1[1,20]	0[0,0]	0[0,0]	0[0,0]
hsa-miR-186-5p	KBTBD11	0[0,0]	0[0,0]	0[0,0]	0[0,0]	1[1,2]
hsa-miR-186-5p	KIF11	0[0,0]	0[0,0]	0[0,0]	1[13,612]	2[13,616]
hsa-miR-186-5p	KIF23	0[0,0]	0[0,0]	0[0,0]	0[0,0]	1[7,216]
hsa-miR-186-5p	MCM6	0[0,0]	0[0,0]	0[0,0]	0[0,0]	1[2,49]
hsa-miR-186-5p	MELK	0[0,0]	0[0,0]	0[0,0]	0[0,0]	2[4,69]
hsa-miR-186-5p	MSH2	0[0,0]	0[0,0]	0[0,0]	0[0,0]	1[1,176]
hsa-miR-186-5p	NEK2	0[0,0]	0[0,0]	0[0,0]	0[0,0]	4[12,461]
hsa-miR-186-5p	NR4A2	1[2,364]	5[2,1219]	0[0,0]	1[2,364]	2[3,558]
hsa-miR-186-5p	NRCAM	0[0,0]	0[0,0]	0[0,0]	0[0,0]	1[1,8]
hsa-miR-186-5p	NUSAP1	0[0,0]	0[0,0]	0[0,0]	0[0,0]	1[4,235]
hsa-miR-186-5p	OAT	0[0,0]	0[0,0]	0[0,0]	0[0,0]	1[4,25]
hsa-miR-186-5p	P2RY13	0[0,0]	0[0,0]	0[0,0]	0[0,0]	1[1,1]
hsa-miR-186-5p	PHLDA1	0[0,0]	0[0,0]	0[0,0]	0[0,0]	1[2,11]
hsa-miR-186-5p	PLAC8	0[0,0]	0[0,0]	0[0,0]	0[0,0]	1[1,75]
hsa-miR-186-5p	PLSCR4	0[0,0]	0[0,0]	0[0,0]	0[0,0]	2[2,74]
hsa-miR-186-5p	PRC1	0[0,0]	0[0,0]	0[0,0]	0[0,0]	2[2,253]
hsa-miR-186-5p	PTTG1	0[0,0]	0[0,0]	0[0,0]	1[3,47]	1[3,47]
hsa-miR-186-5p	RACGAP1	0[0,0]	0[0,0]	0[0,0]	0[0,0]	1[6,74]
hsa-miR-186-5p	RAD51AP1	0[0,0]	0[0,0]	0[0,0]	0[0,0]	1[2,17]
hsa-miR-186-5p	RND3	0[0,0]	0[0,0]	0[0,0]	1[1,23]	2[2,110]
hsa-miR-186-5p	RNF125	1[2,56]	0[0,0]	0[0,0]	1[2,56]	1[2,56]
hsa-miR-186-5p	RRAGD	0[0,0]	3[6,36]	0[0,0]	0[0,0]	0[0,0]
hsa-miR-186-5p	STK39	0[0,0]	0[0,0]	0[0,0]	0[0,0]	2[1,22]
hsa-miR-186-5p	SULF2	0[0,0]	0[0,0]	0[0,0]	0[0,0]	1[1,8]
hsa-miR-186-5p	TIGD1	0[0,0]	0[0,0]	0[0,0]	0[0,0]	1[1,9]
hsa-miR-186-5p	TPR	1[4,724]	1[4,724]	0[0,0]	1[4,724]	1[6,746]
hsa-miR-186-5p	TRIP13	0[0,0]	0[0,0]	0[0,0]	0[0,0]	1[4,179]
hsa-miR-186-5p	TSPAN12	0[0,0]	0[0,0]	0[0,0]	0[0,0]	1[1,138]
hsa-miR-186-5p	TTC9	0[0,0]	0[0,0]	0[0,0]	0[0,0]	1[1,8]
hsa-miR-186-5p	TXNRD1	0[0,0]	0[0,0]	1[1,748]	0[0,0]	0[0,0]
hsa-miR-186-5p	UBE2T	0[0,0]	0[0,0]	0[0,0]	0[0,0]	1[2,53]
hsa-miR-186-5p	ZBTB41	0[0,0]	6[12,1239]	0[0,0]	1[8,152]	1[8,152]
hsa-miR-186-5p	ZWINT	0[0,0]	0[0,0]	0[0,0]	0[0,0]	1[2,14]
hsa-miR-200a-5p	ANK3	0[0,0]	0[0,0]	1[1,24]	0[0,0]	0[0,0]
hsa-miR-200a-5p	C1orf43	0[0,0]	0[0,0]	1[7,395]	0[0,0]	0[0,0]
hsa-miR-200a-5p	CCL2	0[0,0]	0[0,0]	1[1,55]	0[0,0]	0[0,0]
hsa-miR-200a-5p	DLG5	0[0,0]	0[0,0]	1[2,16]	0[0,0]	0[0,0]
hsa-miR-200a-5p	EPB41L4B	0[0,0]	0[0,0]	1[1,27]	0[0,0]	0[0,0]
hsa-miR-200a-5p	PLSCR4	0[0,0]	0[0,0]	1[3,128]	0[0,0]	0[0,0]
hsa-miR-200a-5p	PODXL	0[0,0]	0[0,0]	1[1,12]	0[0,0]	0[0,0]
hsa-miR-200a-5p	PRC1	0[0,0]	0[0,0]	1[3,235]	0[0,0]	0[0,0]
hsa-miR-200a-5p	PRKAR2B	0[0,0]	0[0,0]	1[2,8]	0[0,0]	0[0,0]
hsa-miR-200a-5p	SLC26A2	0[0,0]	0[0,0]	1[3,40]	0[0,0]	0[0,0]
hsa-miR-200a-5p	SLC3A1	0[0,0]	0[0,0]	1[9,552]	0[0,0]	0[0,0]
hsa-miR-200a-5p	SLCO4C1	0[0,0]	0[0,0]	1[2,0]	0[0,0]	0[0,0]
hsa-miR-200a-5p	STIL	0[0,0]	0[0,0]	1[1,12]	0[0,0]	0[0,0]
hsa-miR-221-3p	ARRDC4	0[0,0]	0[0,0]	1[3,381]	1[3,381]	2[3,382]
hsa-miR-221-3p	CDK1	0[0,0]	0[0,0]	0[0,0]	0[0,0]	1[5,47]
hsa-miR-221-3p	CEP55	0[0,0]	0[0,0]	0[0,0]	1[2,15]	1[3,167]
hsa-miR-221-3p	CLGN	0[0,0]	0[0,0]	0[0,0]	0[0,0]	1[2,32]
hsa-miR-221-3p	CPS1	0[0,0]	0[0,0]	0[0,0]	0[0,0]	1[2,8895]
hsa-miR-221-3p	DLG5	0[0,0]	0[0,0]	1[1,669]	0[0,0]	0[0,0]
hsa-miR-221-3p	E2F7	0[0,0]	0[0,0]	1[2,77]	0[0,0]	0[0,0]
hsa-miR-221-3p	EBF1	0[0,0]	0[0,0]	0[0,0]	0[0,0]	1[1,8]
hsa-miR-221-3p	ECT2	0[0,0]	0[0,0]	1[2,101]	0[0,0]	0[0,0]
hsa-miR-221-3p	FLVCR1	0[0,0]	0[0,0]	0[0,0]	0[0,0]	1[1,50]
hsa-miR-221-3p	FOS	1[2,0]	2[3,9]	0[0,0]	1[2,0]	1[2,0]
hsa-miR-221-3p	GINS1	0[0,0]	0[0,0]	0[0,0]	0[0,0]	2[3,3]
hsa-miR-221-3p	GREM2	0[0,0]	0[0,0]	1[2,12]	0[0,0]	0[0,0]
hsa-miR-221-3p	ID4	0[0,0]	0[0,0]	0[0,0]	0[0,0]	1[1,2]
hsa-miR-221-3p	IGF1	1[1,8]	0[0,0]	0[0,0]	0[0,0]	1[1,8]
hsa-miR-221-3p	IL1RAP	0[0,0]	0[0,0]	1[1,20]	0[0,0]	0[0,0]
hsa-miR-221-3p	ITGA6	0[0,0]	0[0,0]	1[1,17]	0[0,0]	0[0,0]
hsa-miR-221-3p	KIF20A	0[0,0]	0[0,0]	0[0,0]	0[0,0]	1[1,24]
hsa-miR-221-3p	KPNA2	0[0,0]	2[25,3841]	0[0,0]	0[0,0]	2[25,3846]
hsa-miR-221-3p	LIFR	0[0,0]	2[6,3736]	0[0,0]	0[0,0]	0[0,0]
hsa-miR-221-3p	MSH2	0[0,0]	0[0,0]	0[0,0]	0[0,0]	1[1,12]
hsa-miR-221-3p	NUF2	0[0,0]	0[0,0]	0[0,0]	0[0,0]	1[4,92]
hsa-miR-221-3p	PLSCR4	0[0,0]	0[0,0]	0[0,0]	0[0,0]	1[5,54]
hsa-miR-221-3p	RACGAP1	0[0,0]	0[0,0]	0[0,0]	0[0,0]	1[5,94]
hsa-miR-221-3p	RAD51AP1	0[0,0]	0[0,0]	0[0,0]	0[0,0]	1[2,35]
hsa-miR-221-3p	RBM24	0[0,0]	0[0,0]	0[0,0]	0[0,0]	1[1,7]
hsa-miR-221-3p	RRAGD	0[0,0]	0[0,0]	0[0,0]	0[0,0]	1[1,2]
hsa-miR-221-3p	RRM2	0[0,0]	0[0,0]	1[14,467]	0[0,0]	0[0,0]
hsa-miR-221-3p	RUNX1	0[0,0]	0[0,0]	0[0,0]	0[0,0]	1[3,33]
hsa-miR-221-3p	SHCBP1	0[0,0]	0[0,0]	1[10,320]	0[0,0]	0[0,0]
hsa-miR-221-3p	SLC26A2	0[0,0]	0[0,0]	1[3,98]	0[0,0]	0[0,0]
hsa-miR-221-3p	TOX3	0[0,0]	0[0,0]	1[1,2]	0[0,0]	0[0,0]
hsa-miR-221-3p	TSPAN12	0[0,0]	0[0,0]	0[0,0]	0[0,0]	1[1,2]
hsa-miR-221-3p	ZBTB41	0[0,0]	0[0,0]	0[0,0]	0[0,0]	1[1,78]
hsa-miR-221-3p	ZFP36	1[9,406]	0[0,0]	0[0,0]	0[0,0]	1[9,406]
hsa-miR-9-5p	ACSL1	0[0,0]	0[0,0]	0[0,0]	0[0,0]	2[2,20]
hsa-miR-9-5p	ACSL4	0[0,0]	0[0,0]	0[0,0]	0[0,0]	1[1,1]
hsa-miR-9-5p	ALDH8A1	0[0,0]	0[0,0]	0[0,0]	0[0,0]	1[2,12]
hsa-miR-9-5p	ARMCX3	0[0,0]	0[0,0]	0[0,0]	0[0,0]	1[1,5]
hsa-miR-9-5p	CA2	0[0,0]	0[0,0]	0[0,0]	0[0,0]	1[3,55]
hsa-miR-9-5p	CCL2	0[0,0]	0[0,0]	0[0,0]	0[0,0]	1[2,157]
hsa-miR-9-5p	CCNE2	0[0,0]	1[1,10]	1[1,77]	0[0,0]	1[1,77]
hsa-miR-9-5p	CD109	0[0,0]	0[0,0]	1[1,7]	0[0,0]	1[1,9]
hsa-miR-9-5p	CDKN2A	0[0,0]	0[0,0]	0[0,0]	0[0,0]	1[1,7]
hsa-miR-9-5p	CENPE	0[0,0]	0[0,0]	0[0,0]	0[0,0]	1[2,11]
hsa-miR-9-5p	CEP55	0[0,0]	0[0,0]	0[0,0]	0[0,0]	1[1,2]
hsa-miR-9-5p	CNTN4	0[0,0]	0[0,0]	0[0,0]	0[0,0]	1[2,0]
hsa-miR-9-5p	COL15A1	1[2,107]	1[2,107]	0[0,0]	1[2,107]	1[2,107]
hsa-miR-9-5p	COL4A1	0[0,0]	0[0,0]	1[4,2536]	1[4,2536]	2[4,4683]
hsa-miR-9-5p	CTHRC1	1[1,22]	0[0,0]	0[0,0]	1[1,22]	1[1,22]
hsa-miR-9-5p	DEPDC1B	0[0,0]	0[0,0]	1[4,80]	0[0,0]	0[0,0]
hsa-miR-9-5p	DLG5	0[0,0]	0[0,0]	1[5,259]	0[0,0]	0[0,0]
hsa-miR-9-5p	E2F7	0[0,0]	0[0,0]	1[2,46]	0[0,0]	0[0,0]
hsa-miR-9-5p	EBF1	0[0,0]	1[1,11]	0[0,0]	0[0,0]	0[0,0]
hsa-miR-9-5p	EGR1	0[0,0]	0[0,0]	0[0,0]	0[0,0]	1[4,5]
hsa-miR-9-5p	FREM2	1[1,3]	1[1,3]	0[0,0]	1[1,3]	1[1,3]
hsa-miR-9-5p	GADD45A	0[0,0]	0[0,0]	0[0,0]	0[0,0]	1[1,27]
hsa-miR-9-5p	GCH1	0[0,0]	1[1,66]	0[0,0]	0[0,0]	2[2,71]
hsa-miR-9-5p	HELLS	0[0,0]	0[0,0]	0[0,0]	0[0,0]	2[2,29]
hsa-miR-9-5p	HMGB2	0[0,0]	0[0,0]	0[0,0]	0[0,0]	1[8,245]
hsa-miR-9-5p	HMMR	0[0,0]	0[0,0]	0[0,0]	0[0,0]	1[5,591]
hsa-miR-9-5p	HOXA13	0[0,0]	0[0,0]	0[0,0]	0[0,0]	1[2,1564]
hsa-miR-9-5p	ID4	2[2,32]	5[8,222]	0[0,0]	1[2,29]	2[6,87]
hsa-miR-9-5p	IGFBP3	0[0,0]	1[6,2435]	1[9,2445]	0[0,0]	1[1,288]
hsa-miR-9-5p	ITGA6	0[0,0]	1[1,12]	1[1,53]	0[0,0]	0[0,0]
hsa-miR-9-5p	KIF23	1[4,167]	0[0,0]	0[0,0]	0[0,0]	0[0,0]
hsa-miR-9-5p	LIFR	1[2,552]	3[2,893]	0[0,0]	0[0,0]	0[0,0]
hsa-miR-9-5p	MSH2	0[0,0]	0[0,0]	0[0,0]	0[0,0]	2[3,169]
hsa-miR-9-5p	OIP5	0[0,0]	0[0,0]	0[0,0]	0[0,0]	1[2,31]
hsa-miR-9-5p	PLAC8	0[0,0]	0[0,0]	0[0,0]	0[0,0]	1[3,28]
hsa-miR-9-5p	PPARA	0[0,0]	1[3,148]	0[0,0]	0[0,0]	0[0,0]
hsa-miR-9-5p	PRKAR2B	0[0,0]	1[1,5]	0[0,0]	0[0,0]	1[2,8]
hsa-miR-9-5p	RUNX1	1[1,1058]	2[2,1093]	0[0,0]	0[0,0]	0[0,0]
hsa-miR-9-5p	SLC26A2	0[0,0]	0[0,0]	1[1,18]	0[0,0]	0[0,0]
hsa-miR-9-5p	SLC3A1	0[0,0]	0[0,0]	1[1,32]	0[0,0]	0[0,0]
hsa-miR-9-5p	SMYD3	0[0,0]	0[0,0]	0[0,0]	0[0,0]	1[1,9]
hsa-miR-9-5p	SOCS2	0[0,0]	0[0,0]	0[0,0]	0[0,0]	1[1,8]
hsa-miR-9-5p	SPRYD4	0[0,0]	0[0,0]	1[1,2]	0[0,0]	1[1,3]
hsa-miR-9-5p	TRIP13	0[0,0]	0[0,0]	1[7,927]	0[0,0]	0[0,0]
hsa-miR-9-5p	UHRF1	1[3,18]	1[3,18]	0[0,0]	1[3,18]	1[3,18]
hsa-miR-9-5p	ZBTB41	0[0,0]	1[1,9]	0[0,0]	0[0,0]	0[0,0]
miRNA, microRNA; DEmRNA, differentially expressed mRNA.
